# Supplementary material
Source: Elsevier journal article supplement (https://www.sciencedirect.com/science/article/pii/S0085562616302242)
Supplement: mmc1 [file S0085562616302242:mmc1.doc]

Supplementary material 1 - Mantel test between the geographical distance and Jaccard and Morisita-Horn dissimilarity indices of the species composition calculated monthly.

Supplementary material 2 - Environmental variables (maximum temperature- TM, minimum temperature- Tm, relative humidity- RH and precipitation- PR) obtained from Estação Agroclimatológica de Pelotas (31°52’00”S, 52°21’24”W) from February 2013 to January 2014.

Supplementary material 1

| **Months** | **Jaccard index** | | **Morisita-Horn index** | |
| --- | --- | --- | --- | --- |
| **r** | **p** | **r** | **p** |
| Feb/2013 | -0.113 | 0.724 | -0.1541 | 0.836 |
| Mar/2013 | -0.2098 | 0.971 | -0.2429 | 0.976 |
| Apr/2013 | 0.04294 | 0.344 | -0.09925 | 0.753 |
| May/2013 | 0.07805 | 0.244 | 0.00122 | 0.44 |
| Jun/2013 | -0.1888 | 0.929 | -0.05387 | 0.621 |
| Jul/2013 | 0.02409 | 0.395 | 0.1066 | 0.244 |
| Aug/2013 | 0.06236 | 0.297 | 0.09623 | 0.245 |
| Sep/2013 | 0.2085 | 0.081 | 0.189 | 0.089 |
| Oct/2013 | -0.2017 | 0.958 | -0.1824 | 0.945 |
| Nov/2013 | 0.09289 | 0.216 | 0.07655 | 0.266 |
| Dec/2013 | 0.3681 | 0.016 | 0.07829 | 0.257 |
| Jan/2014 | 0.1447 | 0.182 | 0.07999 | 0.274 |

Supplementary material 2

| **Months** | **TM (ºC)** | **Tm (ºC)** | **RH (%)** | **PR (mm)** |
| --- | --- | --- | --- | --- |
| **Feb/2013** | 26.9 | 20.6 | 72.1 | 3.6 |
| **Mar/2013** | 26.4 | 14.7 | 79.1 | 1.5 |
| **Apr/2013** | 23.2 | 13.9 | 83.1 | 36.7 |
| **May/2013** | 21.1 | 12.8 | 86.3 | 9.7 |
| **Jun/2013** | 16.6 | 8.0 | 86.0 | 36.4 |
| **Jul/2013** | 18.8 | 7.7 | 76.9 | 16.6 |
| **Aug/2013** | 19.0 | 4.2 | 83.5 | 0.0 |
| **Sep/2013** | 18.4 | 7.8 | 79.3 | 5.0 |
| **Oct/2013** | 25.3 | 15.8 | 82.5 | 25.8 |
| **Nov/2013** | 28.0 | 18.2 | 79.3 | 0.1 |
| **Dec/2013** | 28.5 | 20.0 | 63.7 | 0.0 |
| **Jan/2014** | 33.7 | 22.7 | 81.1 | 7.2 |
